# Supplementary material for: A new megaspilid wasp from Eocene Baltic amber (Hymenoptera: Ceraphronoidea), with notes on two non-ceraphronoid families: Radiophronidae and Stigmaphronidae
Source: PeerJ journal article supplement (doi:10.7717/peerj.5174), 2018-08-08

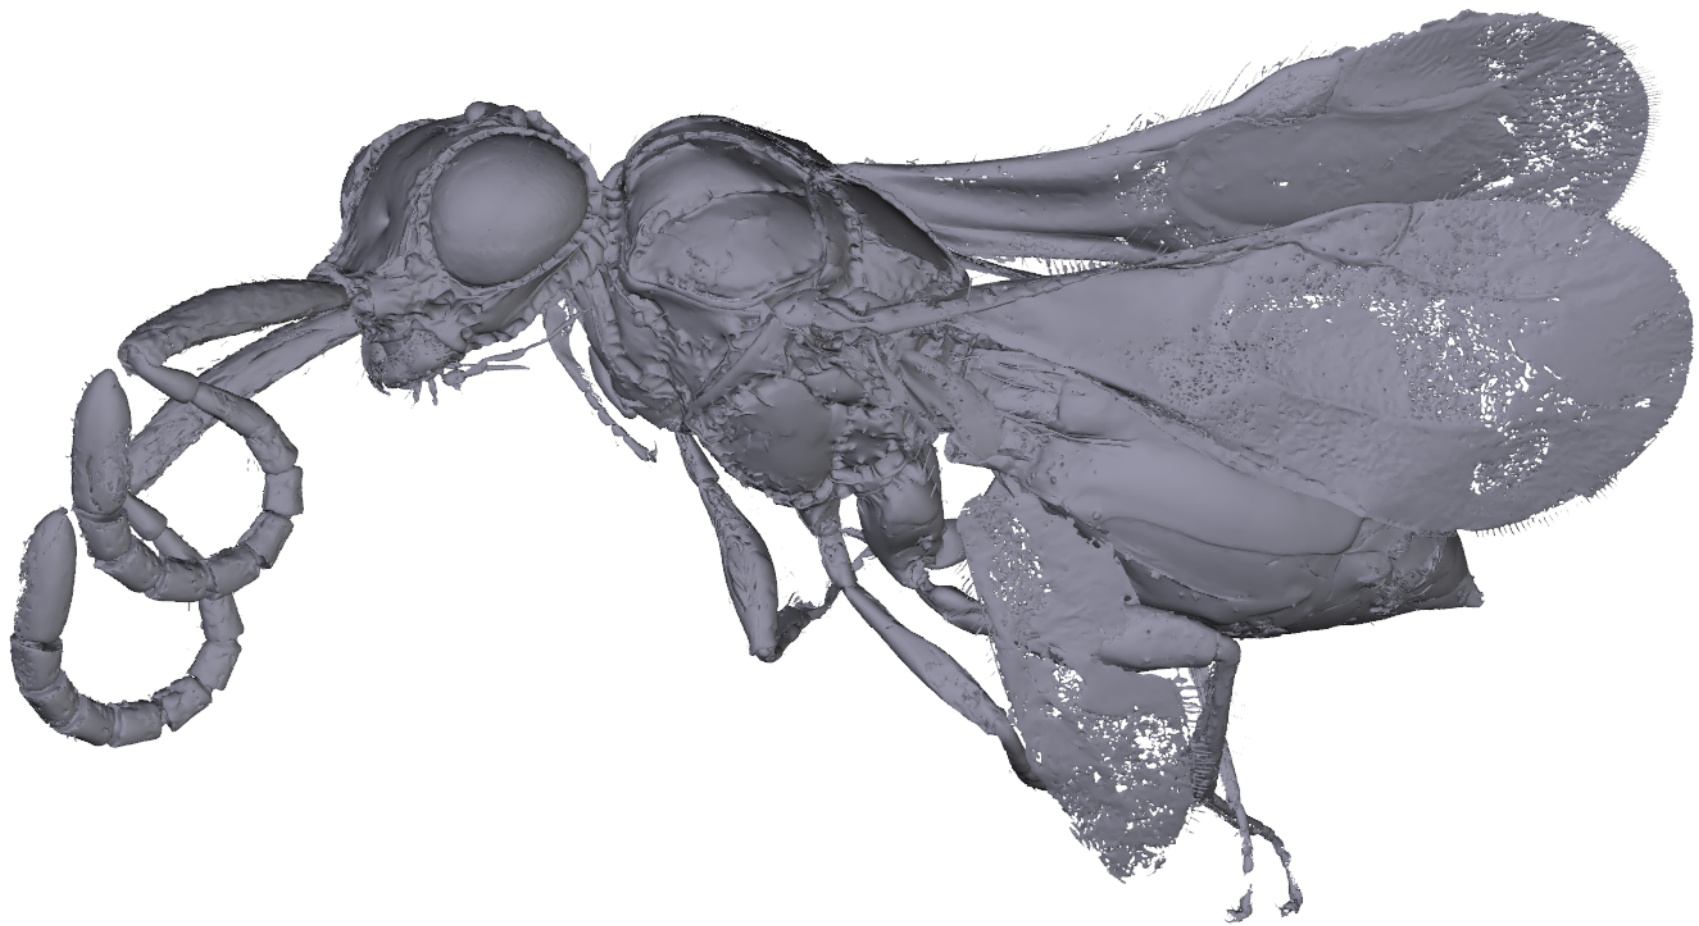

Supplement: Supplementary_3D_Conostigmus_talamasi.pdf [file Supplementary_3D_Conostigmus_talamasi.pdf]
